# Supplementary material for: miR‐129 Attenuates Myocardial Ischemia Reperfusion Injury by Regulating the Expression of PTEN in Rats
Source: Hindawi journal article supplement (doi:10.1155/2021/5535788), 2021-01-01
Supplement: f1 [file 5535788.f1.pdf]

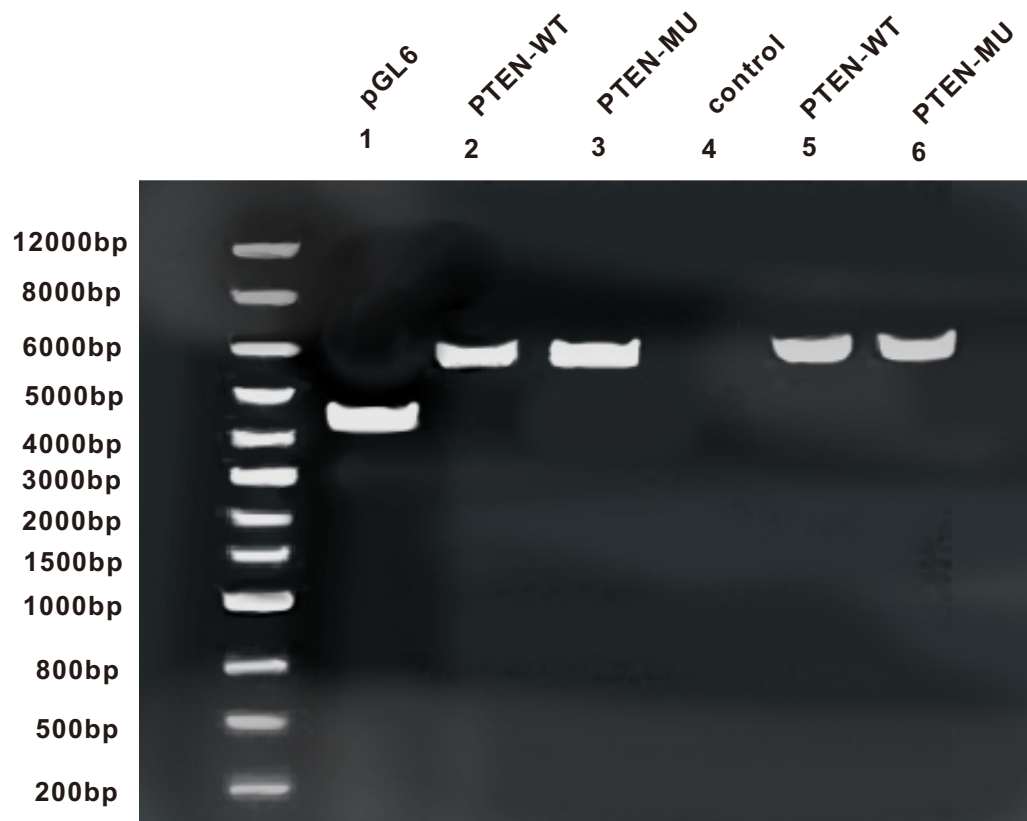

figureS
